# Supplementary material for: miR-181a-5p suppresses invasion and migration of HTR-8/SVneo cells by directly targeting IGF2BP2
Source: PubMed Central journal article supplement (PMC5833820; doi:10.1038/s41419-017-0045-0), 2018-01-16

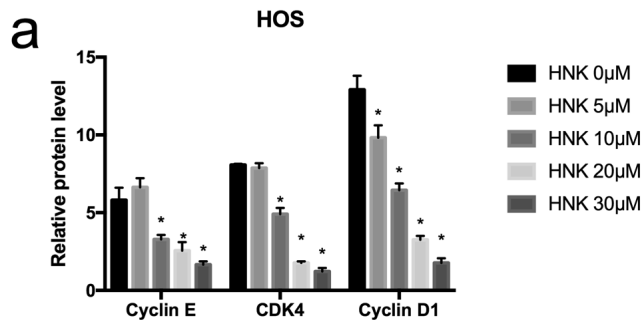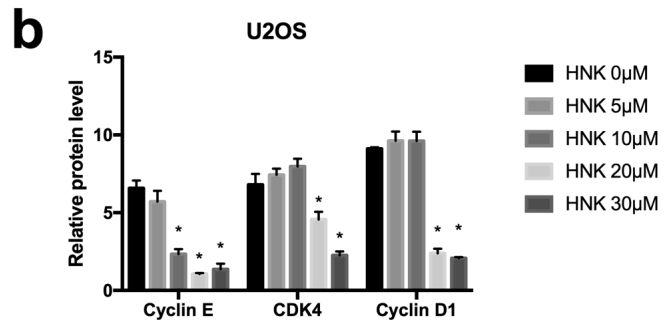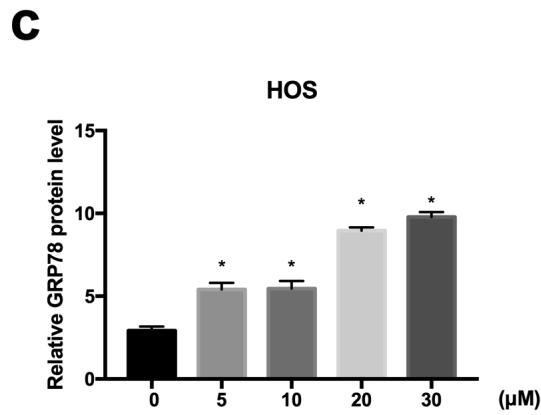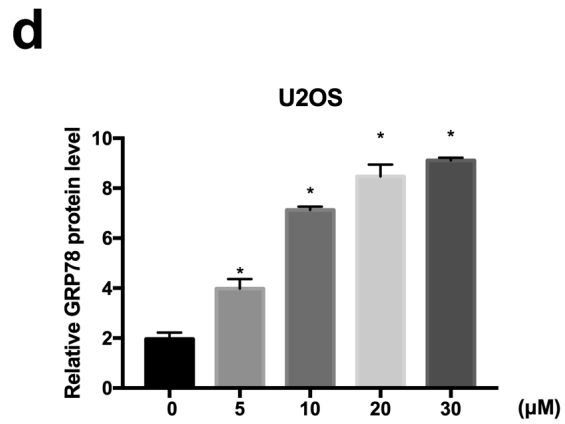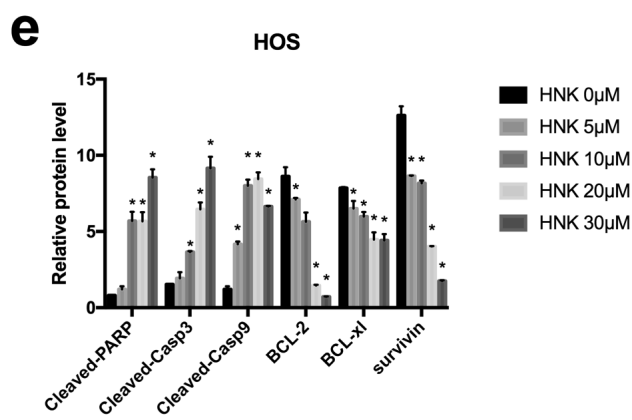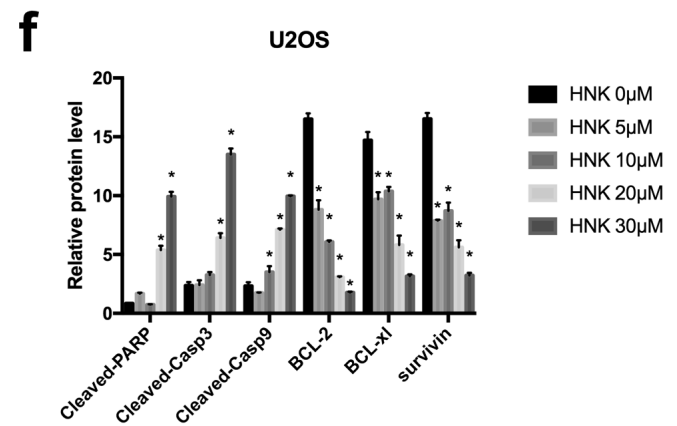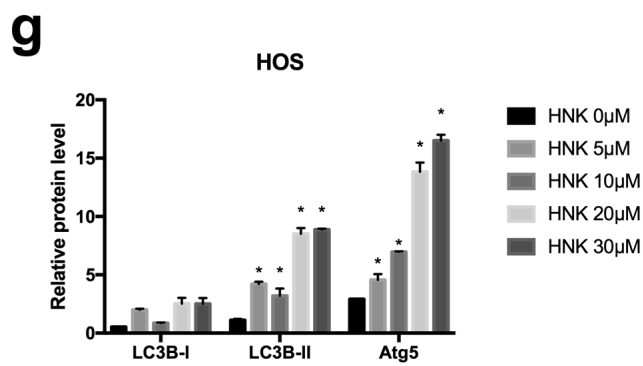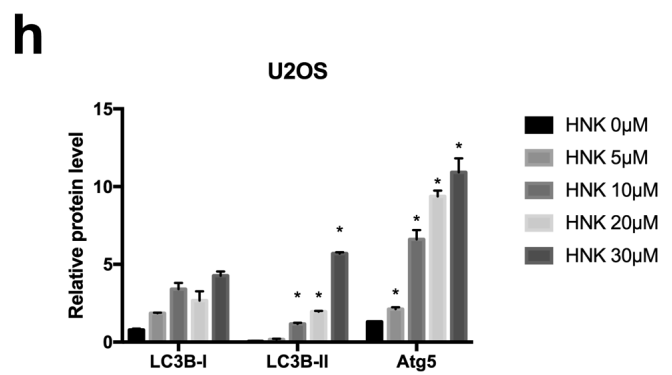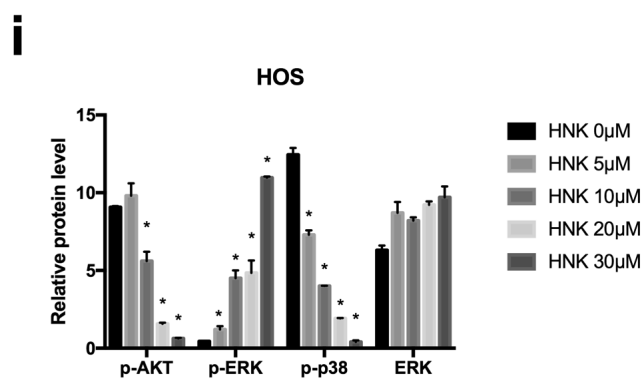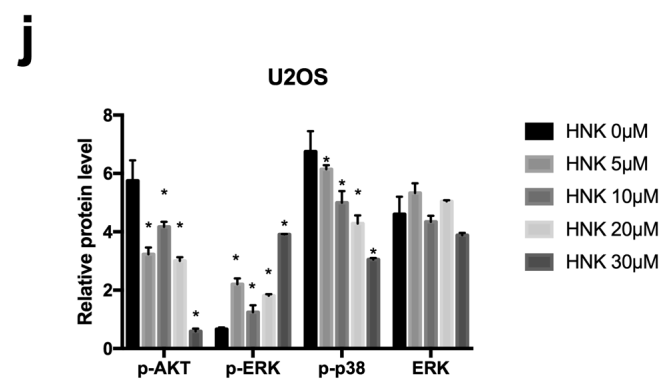

Supplement: 41419_2017_45_MOESM1_ESM.pdf [file 41419_2017_45_MOESM1_ESM.pdf]
